# Supplementary material for: Construction and Curing Behavior of Underwater In Situ Repairing Coatings for Offshore Structures
Source: MDPI journal article supplement (doi:10.3390/polym16030306), 2024-01-23
Supplement: s1 [file s1]

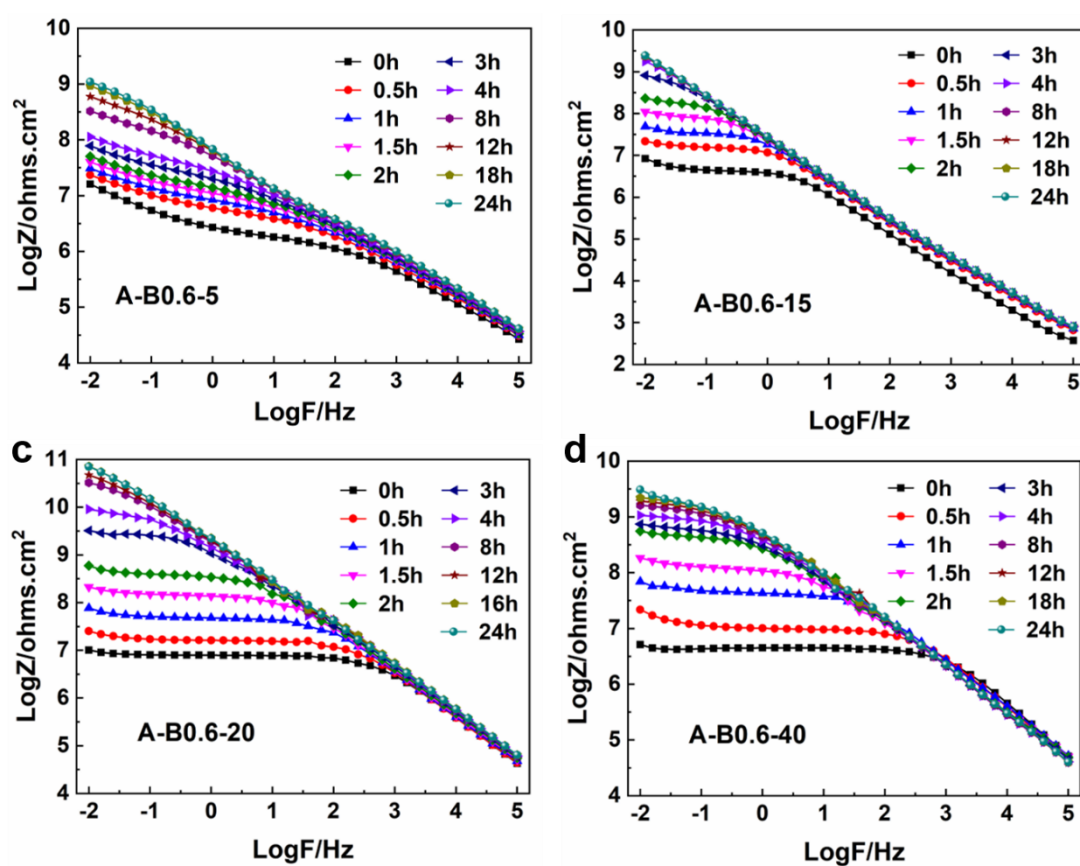

**Figure S1.** Bode plots of the coatings cured in different temperatures during the curing process.

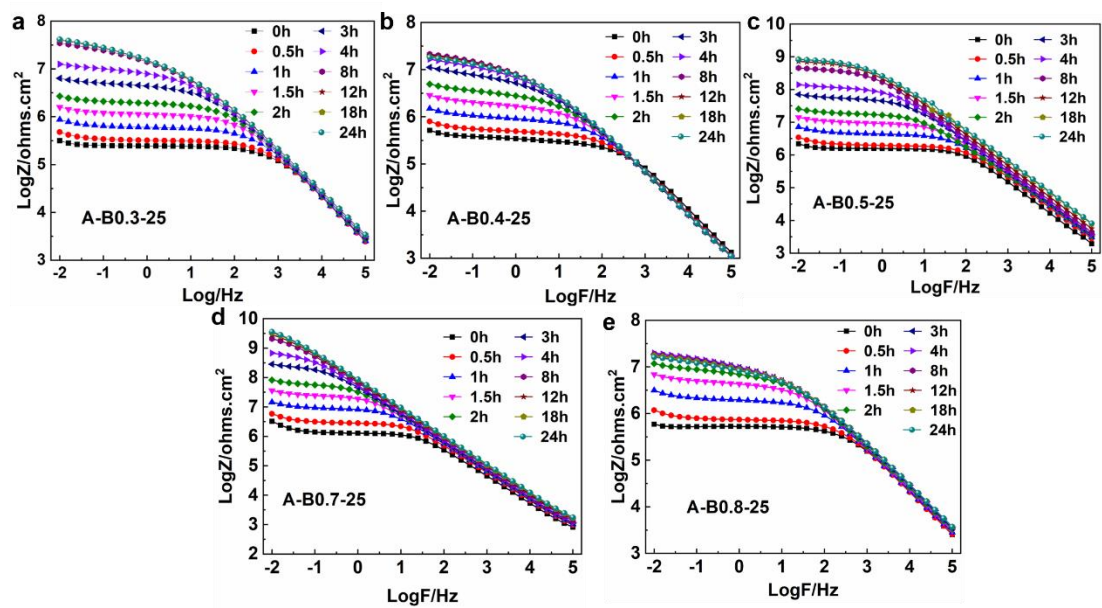

**Figure S2.** Bode plots of the coatings varying in different ratios during the curing process.
